# Supplementary material for: Antitumor Activity of Nanoparticles Loaded with PHT-427, a Novel AKT/PDK1 Inhibitor, for the Treatment of Head and Neck Squamous Cell Carcinoma
Source: Pharmaceutics. 2021 Aug 12;13(8):1242. doi: 10.3390/pharmaceutics13081242 (PMC8401941; doi:10.3390/pharmaceutics13081242)
Supplement: Supplementary file 1 [file pharmaceutics-13-01242-s001.zip › pharmaceutics-1285326-supplementary.pdf]

# Supplementary Materials: Antitumor Activity of Nanoparticles Loaded with PHT-427, a Novel AKT/PDK1 Inhibitor, for the Treatment of Head and Neck Squamous Cell Carcinoma

Joaquín Yanes-Díaz, Raquel Palao-Suay, María Rosa Aguilar, Juan Ignacio Riestra-Ayora, Antonio Ferruelo-Alonso, Luis Rojo del Olmo, Blanca Vázquez-Lasa, Ricardo Sanz-Fernández and Carolina Sánchez-Rodríguez

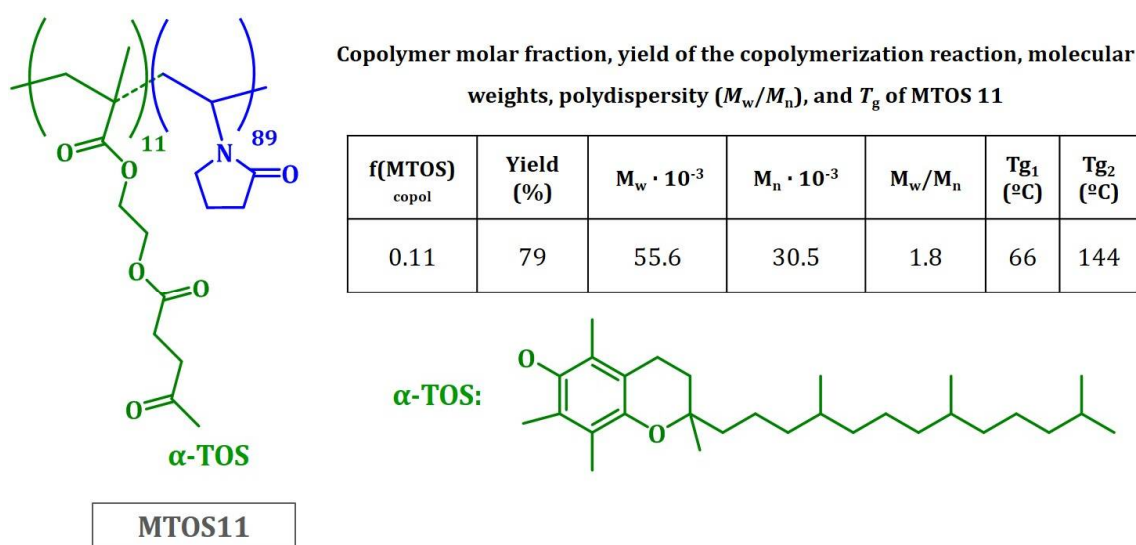

Figure S1. Summary of MTOS11 characterization.

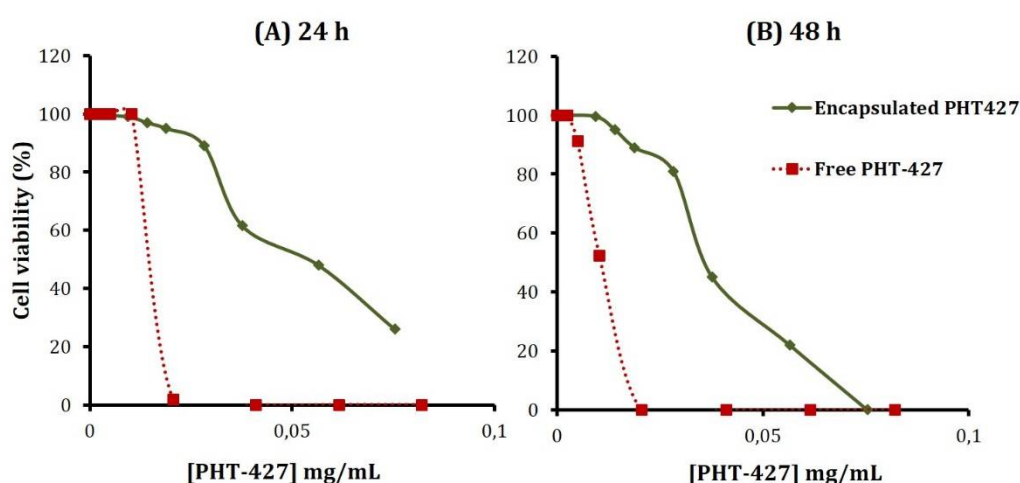

Figure S2. FaDu viability represented against the encapsulated PHT-427 concentration for each NP-427 concentration and compared to free PHT-427 after 24 (A) and 48 h (B).

**Table S1.** FaDu cell viability IC<sub>50</sub> values of PHT-427, NP-Ø and NP-PHT427 after 24 and 48 of treatment.

| Time (h) | Free PHT-427 (mg/mL) | NP-Ø (mg/mL) | NP-PHT427         |                              |
|----------|----------------------|--------------|-------------------|------------------------------|
|          |                      |              | NP-PHT427 (mg/mL) | Encapsulated PHT-427 (mg/mL) |
| 24       | 0.016                | 0.738        | 0.629             | 0.047                        |
| 48       | 0.011                | 0.735        | 0.538             | 0.040                        |
